# Supplementary material for: Carbon stocks and dynamics at different successional stages in an Afromontane tropical forest
Source: Copernicus journal article supplement (doi:10.5194/bg-2016-353), 2016-09-06
Supplement: Supplementary file 1 [file bg-2016-353-supplement.pdf]

**Supplementary information** (Nyirambangutse et al.):

**Table S1.** Biomass and tree turnover properties of all plots. Breast height diameter ( $D$ ) are measured or calculated from diameter measurements above any stem irregularities. Height ( $H$ ) was measured on 930 trees to obtain coefficients to calculate  $H$  (presented here) from  $D$  of all trees. No of stems, basal area (BA), mean  $D$ , mean height ( $H$ ), stem biomass and production (prod) were based on data from all trees > 5 cm  $D_{BH}$ . Big trees are > 40 cm  $D$ . Stem biomass was calculated from eq. 3 based on four different combinations of species specific (Spec.) and generic (Gen.)  $H$  vs  $D$  relationships and wood densities ( $\rho$ ). Mortality and recruitment rate were calculated from eq. 10 and 11 respectively. Successional index was calculated from eq. 9.

| Plot no | No of stems ( $ha^{-1}$ ) | BA ( $m^2$ ) | $D$ (cm) |       | $H$ (m) |      | $H$ of 100 highest trees $ha^{-1}$ (m) | # big trees, $D > 40$ cm | Above ground biomass ( $Mg\ ha^{-1}$ ) |                      |                      |                | Stem prod.                         |                      |                         | Mortality rate | Recruitment rate | Successional index <sub>BA</sub> | Successional index <sub>#</sub> |
|---------|---------------------------|--------------|----------|-------|---------|------|----------------------------------------|--------------------------|----------------------------------------|----------------------|----------------------|----------------|------------------------------------|----------------------|-------------------------|----------------|------------------|----------------------------------|---------------------------------|
|         |                           |              | Mean     | Max   | Mean    | Max  |                                        |                          | Spec. $H, \rho$                        | Gen. $H, spec. \rho$ | Spec. $H, gen. \rho$ | Gen. $H, \rho$ | Biomass ( $Mg\ ha^{-1}\ yr^{-1}$ ) | RGR ( $\% yr^{-1}$ ) | $\rho$ ( $g\ cm^{-3}$ ) |                |                  |                                  |                                 |
| 1       | 732                       | 20.3         | 14.8     | 81.0  | 13.7    | 31.2 | 21.7                                   | 26                       | 142                                    | 148                  | 165                  | 161            | 7.3                                | 6.7                  | 0.53                    | 1.7            | 4.8              | 0.050                            | 0.084                           |
| 2       | 850                       | 28.4         | 17.5     | 81.3  | 15.7    | 29.8 | 22.2                                   | 28                       | 182                                    | 190                  | 226                  | 233            | 9.3                                | 4.9                  | 0.47                    | 1.0            | 4.3              | 0.012                            | 0.0093                          |
| 3       | 678                       | 20.2         | 15.4     | 78.4  | 14.5    | 34.5 | 22.0                                   | 40                       | 148                                    | 152                  | 172                  | 162            | 6.7                                | 9.7                  | 0.49                    | 1.0            | 14.1             | 0.057                            | 0.0086                          |
| 4       | 1220                      | 33.2         | 15.6     | 98.8  | 14.8    | 31.2 | 22.9                                   | 30                       | 248                                    | 251                  | 271                  | 272            | 4.5                                | 2.3                  | 0.51                    | 0.5            | 1.5              | 0.178                            | 0.103                           |
| 5       | 530                       | 22.3         | 19.1     | 78.7  | 16.1    | 31.7 | 22.4                                   | 40                       | 153                                    | 159                  | 190                  | 198            | 4.0                                | 6.0                  | 0.46                    | 0.7            | 3.1              | 0.021                            | 0.019                           |
| 6       | 338                       | 21.2         | 21.7     | 86.9  | 15.1    | 31.8 | 22.8                                   | 62                       | 157                                    | 170                  | 193                  | 199            | 3.4                                | 5.6                  | 0.51                    | 1.2            | 5.2              | 0.002                            | 0.011                           |
| 7       | 466                       | 30.4         | 18.9     | 131.4 | 13.5    | 30.8 | 24.3                                   | 58                       | 300                                    | 322                  | 301                  | 316            | 4.2                                | 6.9                  | 0.51                    | 2.7            | 5.6              | 0.549                            | 0.071                           |
| 8       | 484                       | 36.9         | 23.0     | 126.1 | 16.7    | 38.0 | 26.3                                   | 70                       | 342                                    | 346                  | 379                  | 376            | 7.5                                | 5.3                  | 0.49                    | 1.4            | 4.3              | 0.209                            | 0.079                           |
| 9       | 336                       | 27.1         | 22.0     | 105.9 | 15.6    | 33.3 | 23.6                                   | 46                       | 279                                    | 298                  | 273                  | 287            | 4.3                                | 5.9                  | 0.52                    | 1.7            | 5.3              | 0.349                            | 0.092                           |
| 10      | 1798                      | 45.1         | 14.2     | 69.0  | 13.4    | 33.6 | 25.9                                   | 68                       | 392                                    | 393                  | 370                  | 371            | 7.9                                | 2.1                  | 0.62                    | 0.8            | 0.4              | 0.598                            | 0.518                           |
| 11      | 536                       | 60.9         | 28.3     | 102.2 | 18.7    | 37.7 | 33.0                                   | 172                      | 793                                    | 743                  | 699                  | 650            | 8.1                                | 2.9                  | 0.59                    | 1.3            | 0.7              | 0.888                            | 0.398                           |
| 12      | 446                       | 17.5         | 16.3     | 79.6  | 13.0    | 29.0 | 21.7                                   | 28                       | 159                                    | 170                  | 156                  | 165            | 3.3                                | 5.6                  | 0.56                    | 1.7            | 2.6              | 0.575                            | 0.217                           |
| 13      | 1080                      | 26.4         | 13.9     | 65.3  | 14.2    | 29.6 | 26.1                                   | 32                       | 229                                    | 217                  | 231                  | 213            | 7.0                                | 4.2                  | 0.58                    | 1.6            | 1.7              | 0.383                            | 0.234                           |
| 14      | 596                       | 31.2         | 19.0     | 106.2 | 15.7    | 38.8 | 28.7                                   | 66                       | 343                                    | 319                  | 326                  | 298            | 4.4                                | 4.2                  | 0.62                    | 1.6            | 2.2              | 0.559                            | 0.294                           |
| 15      | 812                       | 26.0         | 15.3     | 85.5  | 13.7    | 35.5 | 25.0                                   | 46                       | 245                                    | 245                  | 232                  | 225            | 4.2                                | 3.8                  | 0.62                    | 1.6            | 1.3              | 0.617                            | 0.246                           |
| Mean    | 727                       | 29.8         | 18.3     | 91.8  | 15.0    | 33.1 | 24.6                                   | 54                       | 274                                    | 275                  | 279                  | 275            | 5.7                                | 5.1                  | 0.5                     | 1.4            | 3.8              | 0.336                            | 0.159                           |

**Table S2.** Properties of all species identified within the 15 plots at census I (2011/2012) and II (2014/2015). Wood density ( $\rho$ ) was obtained from measurements of the most common species, indicated by # for number of sampled trees and standard deviation (SD) of the mean. Wood density from other species are from the global wood density databases (Chave et al 2009, Zanne et al 2009). Breast height diameter ( $D$ ) were measured or calculated from diameter measurements above any stem irregularities. Height ( $H$ ) was measured on 930 trees among the most common species (see Table S3) to obtain coefficients to calculate  $H$  (presented here) from  $D$  of all trees. No of living, new and dead represents the classification in census II (2015). Rank represents the most abundant species based on no of stems, basal area (BA) and relative growth rates (RGR). The BAs are based on all 15 plots (7.5 ha).

| Species                           | $\rho$ (g cm <sup>-3</sup> ) |             |    | $D$ (cm) |      | $H$ (m) |      | Stem biomass (kg) |      | Number of trees |     |      | Rank    |    |     | BA (m <sup>2</sup> ha <sup>-1</sup> ) | No of big trees, $D > 40$ cm | RGR (% yr <sup>-1</sup> ) |
|-----------------------------------|------------------------------|-------------|----|----------|------|---------|------|-------------------|------|-----------------|-----|------|---------|----|-----|---------------------------------------|------------------------------|---------------------------|
|                                   | #                            | Mean        | SD | Mean     | Max  | Mean    | Max  | Mean              | Max  | Living          | New | Dead | # stems | BA | RGR |                                       |                              |                           |
| <i>Afrocrania volkensii</i>       | 2                            | 0.53 ± 0.00 |    | 17.3     | 58.6 | 19.0    | 29.6 | 276               | 2812 | 119             | 1   | 3    | 11      | 13 | 33  | 0.504                                 | 3                            | 4.6                       |
| <i>Agauria salicifolia</i>        | 2                            | 0.53 ± 0.02 |    | 20.8     | 62.0 | 14.3    | 24.3 | 347               | 2555 | 82              |     | 2    | 13      | 11 | 81  | 0.559                                 | 10                           | 0.3                       |
| <i>Alangium chinense</i>          |                              | 0.40        |    | 8.7      | 12.5 | 10.7    | 13.6 | 27                | 49   | 2               | 1   |      | 70      | 75 | 8   | 0.002                                 |                              | 9.5                       |
| <i>Albizia gummifera</i>          |                              | 0.53        |    | 6.7      | 6.7  | 9.4     | 9.4  | 13                | 13   | 1               |     |      | 76      | 80 | 64  | 0.0005                                |                              | 2.1                       |
| <i>Alchornea hirtella</i>         |                              | 0.53        |    | 5.7      | 8.9  | 8.6     | 11.2 | 9                 | 27   | 138             | 22  | 13   | 10      | 39 | 42  | 0.053                                 |                              | 4.2                       |
| <i>Anthocleista grandiflora</i>   |                              | 0.58        |    | 22.7     | 57.4 | 17.0    | 27.9 | 607               | 2754 | 6               |     |      | 55      | 41 | 68  | 0.051                                 | 1                            | 1.9                       |
| <i>Antidesma venenosum</i>        |                              | 0.65        |    | 16.9     | 31.7 | 15.3    | 21.9 | 232               | 762  | 7               |     |      | 54      | 51 | 59  | 0.026                                 |                              | 2.6                       |
| <i>Apodytes dimidiata</i>         |                              | 0.61        |    | 16.3     | 50.3 | 14.1    | 26.6 | 336               | 2137 | 16              |     | 1    | 38      | 34 | 37  | 0.081                                 | 1                            | 4.2                       |
| <i>Balthasarea schliebenii</i>    |                              | 0.59        |    | 28.0     | 60.5 | 19.3    | 28.4 | 824               | 3169 | 6               |     |      | 56      | 36 | 54  | 0.067                                 | 1                            | 2.9                       |
| <i>Beilschmiedia rwandensis</i>   | 5                            | 0.68 ± 0.01 |    | 31.5     | 78.0 | 14.4    | 26.8 | 1452              | 5627 | 16              |     |      | 39      | 19 | 70  | 0.287                                 | 5                            | 1.9                       |
| <i>Bersama abyssinica</i>         |                              | 0.62        |    | 30.9     | 81.3 | 11.8    | 19.9 | 1145              | 4173 | 4               |     |      | 63      | 35 | 38  | 0.078                                 | 1                            | 4.2                       |
| <i>Bridelia brideliifolia</i>     |                              | 0.55        |    | 14.6     | 38.9 | 14.1    | 23.9 | 163               | 1063 | 14              |     |      | 40      | 44 | 63  | 0.042                                 |                              | 2.5                       |
| <i>Carapa grandiflora</i>         | 8                            | 0.57 ± 0.08 |    | 12.8     | 73.9 | 13.5    | 27.6 | 196               | 4431 | 266             | 14  | 2    | 4       | 8  | 18  | 0.786                                 | 9                            | 6.3                       |
| <i>Casearia runssorica</i>        |                              | 0.63        |    | 14.1     | 39.6 | 12.7    | 26.7 | 222               | 1383 | 11              | 1   |      | 45      | 47 | 65  | 0.035                                 |                              | 2.3                       |
| <i>Cassipourea gummifera</i>      |                              | 0.63        |    | 9.7      | 9.7  | 11.7    | 11.7 | 40                | 40   | 1               |     |      | 77      | 77 | 60  | 0.001                                 |                              | 2.6                       |
| <i>Cassipourea ndando</i>         |                              | 0.63        |    | 6.8      | 9.6  | 9.5     | 11.7 | 18                | 39   | 5               |     |      | 59      | 71 | 12  | 0.003                                 |                              | 7.7                       |
| <i>Cassipourea ruwensoriensis</i> |                              | 0.63        |    | 13.0     | 43.9 | 12.6    | 25.2 | 199               | 1608 | 21              | 5   |      | 36      | 37 | 20  | 0.063                                 | 1                            | 6.1                       |
| <i>Cassipourea spp</i>            |                              | 0.63        |    | 13.1     | 39.6 | 13.1    | 24.1 | 175               | 1261 | 11              |     |      | 46      | 48 | 36  | 0.030                                 |                              | 4.3                       |
| <i>Chassalia subochreatea</i>     |                              | 0.59        |    | 5.8      | 8.6  | 8.7     | 10.9 | 11                | 28   | 37              | 1   | 3    | 26      | 57 | 44  | 0.015                                 |                              | 3.9                       |
| <i>Chionanthus africanus</i>      | 4                            | 0.53 ± 0.03 |    | 9.7      | 38.8 | 10.8    | 24.2 | 61                | 1033 | 80              | 4   | 2    | 14      | 28 | 25  | 0.111                                 |                              | 5.2                       |
| <i>Chrysophyllum gorungosanum</i> |                              | 0.54        |    | 21.1     | 36.0 | 17.0    | 23.2 | 341               | 861  | 10              |     |      | 52      | 38 | 57  | 0.059                                 |                              | 2.6                       |
| <i>Chrysophyllum rwandense</i>    |                              | 0.65        |    | 37.7     | 55.0 | 25.6    | 31.8 | 1692              | 3251 | 10              |     |      | 53      | 25 | 67  | 0.176                                 | 6                            | 2.1                       |

| Species                           | $\rho$ (g cm <sup>-3</sup> )     |             |             | <i>D</i> (cm) |       | <i>H</i> (m) |      | Stem biomass (kg) |       | Number of trees |     |      | Rank    |    |     | BA (m <sup>2</sup> ha <sup>-1</sup> ) | No of big trees, <i>D</i> > 40 cm | RGR (% yr <sup>-1</sup> ) |
|-----------------------------------|----------------------------------|-------------|-------------|---------------|-------|--------------|------|-------------------|-------|-----------------|-----|------|---------|----|-----|---------------------------------------|-----------------------------------|---------------------------|
|                                   | #                                | Mean        | SD          | Mean          | Max   | Mean         | Max  | Mean              | Max   | Living          | New | Dead | # stems | BA | RGR |                                       |                                   |                           |
|                                   | <i>Cleistanthus polystachyus</i> | 8           | 0.63 ± 0.09 |               | 27.4  | 75.2         | 20.9 | 38.8              | 1033  | 7025            | 71  | 3    |         | 16 | 7   | 49                                    | 0.790                             | 16                        |
| <i>CreMASpora triflora</i>        |                                  | 0.59        |             | 9.5           | 17.1  | 11.3         | 16.1 | 49                | 155   | 12              | 1   | 1    | 44      | 58 | 32  | 0.015                                 |                                   | 4.8                       |
| <i>Dasylepis racemosa</i>         |                                  | 0.64        |             | 6.6           | 7.4   | 9.3          | 10.0 | 16                | 21    | 2               |     |      | 71      | 78 | 24  | 0.001                                 |                                   | 5.2                       |
| <i>Dichaetanthera corymbosa</i>   |                                  | 0.59        |             | 16.0          | 37.0  | 14.9         | 23.4 | 186               | 1005  | 26              |     | 2    | 30      | 31 | 47  | 0.092                                 |                                   | 3.6                       |
| <i>Drypetes gerrardii</i>         |                                  | 0.70        |             | 20.3          | 29.0  | 17.0         | 21.0 | 368               | 667   | 2               |     |      | 72      | 60 | 77  | 0.010                                 |                                   | 0.8                       |
| <i>Drypetes occidentalis</i>      |                                  | 0.71        |             | 6.8           | 9.6   | 9.4          | 11.7 | 21                | 44    | 4               |     |      | 64      | 74 | 11  | 0.002                                 |                                   | 7.8                       |
| <i>Ekebergia capensis</i>         |                                  | 0.47        |             | 14.5          | 126.1 | 13.0         | 34.8 | 420               | 12955 | 35              | 2   | 2    | 27      | 21 | 66  | 0.229                                 | 1                                 | 2.2                       |
| <i>Erica johnstonii</i>           |                                  | 0.59        |             | 16.4          | 16.4  | 15.8         | 15.8 | 140               | 140   | 1               |     |      | 78      | 70 | 80  | 0.003                                 |                                   | 0.5                       |
| <i>Faurea saligna</i>             | 3                                | 0.76 ± 0.03 |             | 54.8          | 102.2 | 29.0         | 37.7 | 4512              | 14936 | 49              |     |      | 20      | 3  | 79  | 1.804                                 | 38                                | 0.5                       |
| <i>Ficalhoa laurifolia</i>        | 3                                | 0.60 ± 0.03 |             | 27.0          | 71.0  | 23.6         | 36.8 | 943               | 5689  | 66              |     | 6    | 18      | 9  | 74  | 0.735                                 | 14                                | 1.2                       |
| <i>Ficus oreadum</i>              |                                  | 0.41        |             | 6.7           | 10.5  | 9.3          | 12.3 | 12                | 32    | 5               | 2   |      | 60      | 72 | 1   | 0.003                                 |                                   | 19.8                      |
| <i>Galiniera coffeoides</i>       |                                  | 0.59        |             | 7.8           | 18.8  | 10.1         | 16.9 | 28                | 195   | 241             | 36  | 13   | 5       | 23 | 23  | 0.185                                 |                                   | 5.7                       |
| <i>Garcinia volkensii</i>         |                                  | 0.73        |             | 13.1          | 30.5  | 13.4         | 21.5 | 140               | 785   | 39              | 1   |      | 24      | 33 | 50  | 0.086                                 |                                   | 3.0                       |
| <i>Grewia mildbraedii</i>         |                                  | 0.56        |             | 9.8           | 35.2  | 11.3         | 22.9 | 76                | 844   | 17              |     |      | 37      | 52 | 4   | 0.025                                 |                                   | 11.5                      |
| <i>Hagenia abyssinica</i>         |                                  | 0.57        |             | 17.9          | 55.9  | 14.8         | 27.6 | 369               | 2535  | 11              | 6   | 5    | 47      | 32 | 17  | 0.089                                 | 2                                 | 6.9                       |
| <i>Harungana montana</i>          | 2                                | 0.53 ± 0.06 |             | 31.6          | 86.9  | 20.0         | 31.8 | 1080              | 6438  | 44              | 5   | 2    | 21      | 10 | 10  | 0.701                                 | 11                                | 8.2                       |
| <i>Ilex mitis</i>                 | 2                                | 0.51 ± 0.02 |             | 15.7          | 67.7  | 14.3         | 27.0 | 268               | 3277  | 77              | 4   | 1    | 15      | 17 | 75  | 0.360                                 | 7                                 | 1.2                       |
| <i>Ixora burundensis</i>          |                                  | 0.79        |             | 10.9          | 21.6  | 12.2         | 18.2 | 95                | 367   | 28              | 1   | 1    | 28      | 43 | 56  | 0.044                                 |                                   | 2.7                       |
| <i>Lepidotrichilia volkensii</i>  |                                  | 0.59        |             | 7.0           | 8.7   | 9.6          | 11.0 | 17                | 29    | 6               |     |      | 57      | 68 | 51  | 0.003                                 |                                   | 3.0                       |
| <i>Lindackeria kivuensis</i>      |                                  | 0.56        |             | 7.0           | 8.3   | 9.6          | 10.7 | 16                | 24    | 4               | 1   |      | 65      | 73 | 5   | 0.002                                 |                                   | 11.3                      |
| <i>Macaranga kilimandscharica</i> | 9                                | 0.44 ± 0.03 |             | 15.9          | 70.7  | 15.4         | 24.5 | 158               | 2762  | 1977            | 245 | 58   | 1       | 2  | 9   | 7.468                                 | 59                                | 8.2                       |
| <i>Maesa lanceolata</i>           |                                  | 0.68        |             | 10.2          | 20.0  | 6.0          | 10.0 | 37                | 150   | 26              | 3   | 5    | 31      | 46 | 28  | 0.040                                 |                                   | 5.1                       |
| <i>Magnistipula butayei</i>       |                                  | 0.59        |             | 9.7           | 12.1  | 11.6         | 13.3 | 41                | 65    | 4               |     |      | 66      | 67 | 22  | 0.004                                 |                                   | 5.5                       |
| <i>Maytenus acuminata</i>         | 2                                | 0.74 ± 0.02 |             | 10.6          | 54.1  | 11.9         | 21.4 | 96                | 2401  | 236             | 10  | 5    | 6       | 14 | 61  | 0.374                                 | 1                                 | 2.6                       |
| <i>Maytenus undata</i>            |                                  | 0.73        |             | 14.0          | 54.1  | 13.4         | 27.3 | 287               | 3023  | 14              |     |      | 41      | 42 | 45  | 0.049                                 | 1                                 | 3.7                       |
| <i>Memecylon walikalense</i>      |                                  | 0.77        |             | 13.9          | 29.1  | 13.4         | 21.0 | 219               | 732   | 14              | 2   |      | 42      | 45 | 31  | 0.041                                 |                                   | 5.0                       |
| <i>Myrianthus holstii</i>         |                                  | 0.47        |             | 14.9          | 29.7  | 14.1         | 21.2 | 148               | 475   | 6               |     |      | 58      | 55 | 19  | 0.019                                 |                                   | 6.1                       |
| <i>Neoboutonia macrocalyx</i>     |                                  | 0.33        |             | 7.6           | 13.6  | 9.9          | 14.2 | 17                | 50    | 4               | 1   |      | 67      | 69 | 2   | 0.003                                 |                                   | 17.6                      |

| Species                      | $\rho$ (g cm <sup>-3</sup> ) |             |      | <i>D</i> (cm) |       | <i>H</i> (m) |      | Stem biomass (kg) |       | Number of trees |     |      | Rank    |    |     | BA (m <sup>2</sup> ha <sup>-1</sup> ) | No of big trees, <i>D</i> > 40 cm | RGR (% yr <sup>-1</sup> ) |
|------------------------------|------------------------------|-------------|------|---------------|-------|--------------|------|-------------------|-------|-----------------|-----|------|---------|----|-----|---------------------------------------|-----------------------------------|---------------------------|
|                              | #                            | Mean        | SD   | Mean          | Max   | Mean         | Max  | Mean              | Max   | Living          | New | Dead | # stems | BA | RGR |                                       |                                   |                           |
|                              | <i>Newtonia buchananii</i>   |             | 0.50 |               | 6.2   | 6.2          | 9.0  | 9.0               | 10    | 10              | 1   |      |         | 79 | 81  | 39                                    | 0.000                             |                           |
| <i>Nuxia congesta</i>        |                              | 0.68        |      | 17.4          | 29.1  | 15.9         | 21.0 | 221               | 647   | 25              |     | 2    | 32      | 30 | 71  | 0.095                                 |                                   | 1.7                       |
| <i>Ochna afzelii</i>         |                              | 0.75        |      | 11.9          | 19.5  | 12.8         | 17.3 | 110               | 269   | 3               |     |      | 69      | 66 | 34  | 0.005                                 |                                   | 4.6                       |
| <i>Ocotea kenyensis</i>      | 4                            | 0.52 ± 0.11 |      | 26.5          | 99.1  | 17.8         | 38.0 | 1042              | 9822  | 67              | 4   | 1    | 17      | 6  | 15  | 0.902                                 | 14                                | 6.5                       |
| <i>Ocotea usambarensis</i>   | 4                            | 0.49 ± 0.05 |      | 15.2          | 106.2 | 13.3         | 34.6 | 313               | 9677  | 195             | 10  | 2    | 8       | 5  | 27  | 0.971                                 | 13                                | 5.1                       |
| <i>Olea capensis</i>         |                              | 0.77        |      | 27.4          | 71.3  | 17.4         | 30.0 | 1491              | 6006  | 11              |     | 2    | 48      | 24 | 76  | 0.184                                 | 4                                 | 0.8                       |
| <i>Olinia rochetiana</i>     | 1                            | 0.71        |      | 19.6          | 103.6 | 15.0         | 33.3 | 785               | 12741 | 62              | 7   | 3    | 19      | 12 | 41  | 0.538                                 | 6                                 | 4.2                       |
| <i>Oricia renieri</i>        |                              | 0.59        |      | 7.2           | 12.6  | 9.8          | 13.6 | 20                | 72    | 11              | 1   | 1    | 49      | 64 | 21  | 0.007                                 |                                   | 5.8                       |
| <i>Oxyanthus speciosus</i>   |                              | 0.53        |      | 5.0           | 5.0   | 7.9          | 7.9  | 6                 | 6     | 1               | 1   |      | 80      | 83 | 30  | 0.000                                 |                                   | 6.5                       |
| <i>Oxyanthus spp</i>         |                              | 0.53        |      | 16.8          | 28.0  | 14.6         | 20.7 | 234               | 461   | 1               |     | 1    | 81      | 63 | 29  | 0.009                                 |                                   | 4.8                       |
| <i>Parinari excelsa</i>      |                              | 0.70        |      | 21.5          | 69.0  | 16.0         | 29.7 | 786               | 5067  | 11              | 1   | 1    | 50      | 29 | 48  | 0.104                                 | 2                                 | 3.7                       |
| <i>Peddea spp</i>            |                              | 0.59        |      | 7.1           | 8.0   | 9.7          | 10.5 | 18                | 23    | 2               |     |      | 73      | 76 | 78  | 0.001                                 |                                   | 0.6                       |
| <i>Pentadesma reyndersii</i> |                              | 0.77        |      | 15.8          | 21.7  | 15.0         | 18.2 | 205               | 360   | 2               |     |      | 74      | 65 | 40  | 0.006                                 |                                   | 4.1                       |
| <i>Pleiocarpa pycnantha</i>  |                              | 0.59        |      | 17.8          | 26.3  | 15.9         | 20.0 | 221               | 443   | 5               |     |      | 61      | 54 | 46  | 0.020                                 |                                   | 3.6                       |
| <i>Podocarpus falcatus</i>   |                              | 0.60        |      | 11.7          | 25.0  | 12.4         | 19.6 | 104               | 399   | 5               |     |      | 62      | 61 | 82  | 0.010                                 |                                   | 0.2                       |
| <i>Podocarpus latifolius</i> | 4                            | 0.49 ± 0.02 |      | 21.7          | 56.6  | 16.6         | 25.8 | 347               | 2108  | 42              | 1   |      | 23      | 20 | 72  | 0.271                                 | 4                                 | 1.7                       |
| <i>Polyscias fulva</i>       | 3                            | 0.50 ± 0.11 |      | 23.6          | 77.9  | 15.2         | 26.6 | 597               | 4166  | 103             | 20  |      | 12      | 4  | 3   | 1.008                                 | 26                                | 13.2                      |
| <i>Prunus africana</i>       | 2                            | 0.61 ± 0.07 |      | 20.8          | 57.7  | 12.3         | 19.3 | 362               | 2042  | 25              | 3   | 1    | 33      | 26 | 35  | 0.171                                 | 3                                 | 4.8                       |
| <i>Psychotria mahonii</i>    | 3                            | 0.56 ± 0.04 |      | 9.6           | 34.8  | 6.5          | 14.3 | 37                | 523   | 268             | 34  | 22   | 3       | 15 | 16  | 0.367                                 |                                   | 6.6                       |
| <i>Psydrax subcordata</i>    |                              | 0.76        |      | 11.3          | 36.8  | 12.3         | 23.4 | 117               | 1276  | 23              | 1   | 7    | 34      | 40 | 26  | 0.053                                 |                                   | 5.2                       |
| <i>Rapanea melanophloeos</i> | 4                            | 0.67 ± 0.03 |      | 12.1          | 33.0  | 13.3         | 24.4 | 122               | 952   | 146             | 2   | 1    | 9       | 18 | 55  | 0.288                                 |                                   | 2.8                       |
| <i>Rytigynia bridsoniae</i>  |                              | 0.59        |      | 5.6           | 5.6   | 8.4          | 8.4  | 9                 | 9     |                 |     | 1    | 83      | 82 | 73  | 0.0003                                |                                   | 1.5                       |
| <i>Rytigynia bugoyensis</i>  |                              | 0.59        |      | 7.3           | 7.3   | 9.9          | 9.9  | 18                | 18    | 1               |     |      | 82      | 79 | 83  | 0.001                                 |                                   | -1.2                      |
| <i>Rytigynia kigeziensis</i> |                              | 0.59        |      | 8.1           | 24.9  | 10.2         | 19.5 | 41                | 388   | 23              | 1   | 3    | 35      | 53 | 62  | 0.024                                 |                                   | 2.6                       |
| <i>Rytigynia kiwuensis</i>   |                              | 0.59        |      | 8.8           | 23.2  | 10.8         | 18.9 | 43                | 327   | 206             | 25  | 4    | 7       | 22 | 43  | 0.209                                 |                                   | 4.1                       |
| <i>Sapium ellipticum</i>     |                              | 0.55        |      | 22.7          | 27.8  | 18.5         | 20.6 | 315               | 474   | 2               |     |      | 75      | 59 | 69  | 0.011                                 |                                   | 1.9                       |
| <i>Sericanthe leonardii</i>  |                              | 0.59        |      | 8.6           | 16.2  | 10.8         | 15.7 | 35                | 135   | 11              |     |      | 51      | 62 | 58  | 0.010                                 |                                   | 2.6                       |
| <i>Strombosia scheffleri</i> | 8                            | 0.73 ± 0.06 |      | 25.0          | 84.1  | 19.9         | 32.4 | 927               | 8400  | 38              |     |      | 25      | 16 | 53  | 0.360                                 | 5                                 | 2.9                       |

| Species                          | $\rho$ (g cm <sup>-3</sup> ) |             |      | <i>D</i> (cm) |       | <i>H</i> (m) |      | Stem biomass (kg) |       | Number of trees |     |      | Rank    |    |     | BA (m <sup>2</sup> ha <sup>-1</sup> ) | No of big trees, <i>D</i> > 40 cm | RGR (% yr <sup>-1</sup> ) |      |
|----------------------------------|------------------------------|-------------|------|---------------|-------|--------------|------|-------------------|-------|-----------------|-----|------|---------|----|-----|---------------------------------------|-----------------------------------|---------------------------|------|
|                                  | #                            | Mean        | SD   | Mean          | Max   | Mean         | Max  | Mean              | Max   | Living          | New | Dead | # stems | BA | RGR |                                       |                                   |                           |      |
|                                  | <i>Symphonia globulifera</i> |             | 0.60 |               | 20.7  | 62.7         | 15.4 | 28.8              | 640   | 3498            | 14  | 1    |         | 43 | 27  | 6                                     | 0.116                             | 2                         | 10.4 |
| <i>Syzygium guineense</i>        | 11                           | 0.63 ± 0.08 |      | 24.3          | 131.4 | 16.0         | 30.8 | 880               | 16583 | 708             | 20  | 11   | 2       | 1  | 52  | 7.941                                 | 139                               | 3.0                       |      |
| <i>Tabernaemontana stapfiana</i> |                              | 0.52        |      | 18.6          | 25.7  | 16.4         | 19.8 | 212               | 374   | 4               |     |      | 68      | 56 | 13  | 0.017                                 |                                   | 7.4                       |      |
| <i>Tarenna rwendensis</i>        |                              | 0.69        |      | 8.7           | 21.8  | 10.7         | 18.3 | 49                | 326   | 27              | 1   |      | 29      | 49 | 7   | 0.026                                 |                                   | 8.8                       |      |
| <i>Xymalos monospora</i>         |                              | 0.59        |      | 7.1           | 17.0  | 9.6          | 16.1 | 21                | 152   | 43              | 14  | 1    | 22      | 50 | 14  | 0.026                                 |                                   | 7.6                       |      |
| All species:                     |                              |             |      |               |       |              |      |                   |       |                 |     |      |         |    |     |                                       |                                   |                           |      |
| Mean                             |                              | 0.60        |      | 15.4          | 40.9  | 13.5         | 21.4 | 356               | 2333  |                 |     |      |         |    |     |                                       |                                   |                           | 4.62 |
| Sum                              | 94                           |             |      |               |       |              |      |                   |       | 5970            | 519 | 191  |         |    |     |                                       | 406                               |                           |      |

**Table S3.** Species specific relationship of height ( $H$ ) vs diameter at breast height ( $D$ ) were established for the most abundant species based on basal area (BA) of all plots. For the  $H - D$  relationship the fitting parameters  $a$ ,  $b$  and  $c$  in eq. 2, the modelling efficiency (ME) and the simulated height at a  $D$  of 10, 40 and 80 cm are given. Only simulated  $H$  within the range of  $H$  of sampled trees is given. The number of stems (#), measured  $D$  (mean, min, max) and  $H$  (mean, min, max) of the sampled trees are given.

| Species                           | Species abundance                        |      | $H - D$ relationship and properties of sample trees |        |     |      |                              |      |      |     |          |      |       |         |      |      |
|-----------------------------------|------------------------------------------|------|-----------------------------------------------------|--------|-----|------|------------------------------|------|------|-----|----------|------|-------|---------|------|------|
|                                   | BA<br>(m <sup>2</sup> ha <sup>-1</sup> ) | %    | Fitting parameters of eq. 2                         |        |     |      | Simulated $H$ (m) at $D$ of: |      |      | #   | $D$ (cm) |      |       | $H$ (m) |      |      |
|                                   |                                          |      | $a$                                                 | $b$    | $c$ | ME   | 10                           | 40   | 80   |     | Mean     | Min  | Max   | Mean    | Min  | Max  |
| <i>Afrocrania volkensii</i>       | 0.50                                     | 1.7  | 30                                                  | -0.059 | 1.1 | 0.83 | 14.5                         | 28.3 |      | 15  | 22.8     | 6.7  | 59.3  | 20.2    | 9.5  | 30.5 |
| <i>Agauria salicifolia</i>        | 0.56                                     | 1.9  | 141                                                 | -0.028 | 0.5 | 0.81 | 10.9                         | 20.1 |      | 12  | 27.2     | 7.0  | 55.5  | 16.0    | 7.0  | 24.9 |
| <i>Beilschmiedia rwandensis</i>   | 0.29                                     | 1.0  | 39                                                  | -0.034 | 0.8 | 0.86 | 7.7                          | 19.2 | 27.0 | 14  | 31.0     | 5.3  | 78.7  | 14.3    | 2.0  | 32.8 |
| <i>Bersama abyssinica</i>         | 0.08                                     | 0.3  | 20                                                  | -0.052 | 1.0 | 0.91 | 7.9                          | 17.3 | 19.9 | 4   | 31.3     | 6.3  | 81.5  | 11.9    | 3.0  | 20.1 |
| <i>Carapa grandiflora</i>         | 0.78                                     | 2.6  | 28                                                  | -0.039 | 1.2 | 0.71 | 12.9                         | 26.7 | 27.6 | 56  | 21.5     | 6.4  | 74.0  | 18.5    | 6.9  | 32.8 |
| <i>Chionanthus africanus</i>      | 0.11                                     | 0.4  | 31                                                  | -0.066 | 0.9 | 0.88 | 11.7                         | 24.5 |      | 14  | 15.6     | 5.1  | 39.2  | 14.2    | 6.0  | 24.8 |
| <i>Chrysophyllum rwandense</i>    | 0.18                                     | 0.6  | 80                                                  | -0.049 | 0.6 | 0.83 | 13.6                         | 27.5 |      | 10  | 38.1     | 7.3  | 54.8  | 25.8    | 12.3 | 36.0 |
| <i>Cleistanthus polystachyus</i>  | 0.79                                     | 2.6  | 208                                                 | -0.016 | 0.6 | 0.82 | 13.6                         | 27.5 | 37.4 | 37  | 31.0     | 6.0  | 75.8  | 22.4    | 6.1  | 42.8 |
| <i>Faurea saligna</i>             | 1.80                                     | 6.1  | 41                                                  | -0.033 | 0.9 | 0.77 | 10.1                         | 26.3 | 35.3 | 40  | 57.1     | 5.2  | 102.3 | 29.5    | 6.7  | 43.8 |
| <i>Ficalhoa laurifolia</i>        | 0.73                                     | 2.5  | 40                                                  | -0.045 | 1.0 | 0.84 | 13.6                         | 27.5 | 37.4 | 32  | 36.5     | 8.8  | 72.2  | 27.3    | 7.5  | 38.0 |
| <i>Harungana montana</i>          | 0.70                                     | 2.3  | 58                                                  | -0.156 | 0.3 | 0.75 | 16.5                         | 23.9 | 28.3 | 18  | 44.4     | 9.0  | 88.8  | 23.5    | 15.5 | 30.7 |
| <i>Ilex mitis</i>                 | 0.36                                     | 1.2  | 32                                                  | -0.107 | 0.7 | 0.89 | 12.8                         | 23.3 |      | 14  | 30.9     | 5.1  | 60.5  | 19.4    | 8.2  | 29.2 |
| <i>Macaranga kilimandscharica</i> | 7.40                                     | 24.8 | 29                                                  | -0.183 | 0.6 | 0.53 | 13.7                         | 21.6 | 25.0 | 195 | 25.7     | 5.1  | 71.0  | 18.0    | 5.5  | 31.1 |
| <i>Maesa lanceolata</i>           | 0.04                                     | 0.1  | 43                                                  | -0.025 | 0.8 | 0.52 | 6.1                          |      |      | 15  | 12.7     | 6.0  | 20.7  | 7.1     | 3.0  | 12.6 |
| <i>Maytenus acuminata</i>         | 0.37                                     | 1.2  | 21                                                  | -0.067 | 1.1 | 0.77 | 12.3                         |      |      | 16  | 13.7     | 6.0  | 29.6  | 13.7    | 7.1  | 22.4 |
| <i>Ocotea kenyensis</i>           | 0.90                                     | 3.0  | 58                                                  | -0.044 | 0.7 | 0.88 | 11.3                         | 25.1 | 34.8 | 42  | 29.8     | 6.8  | 84.5  | 19.7    | 7.0  | 37.7 |
| <i>Ocotea usambarensis</i>        | 0.97                                     | 3.2  | 42                                                  | -0.064 | 0.7 | 0.76 | 11.7                         | 24.4 | 31.8 | 38  | 27.4     | 6.3  | 107.7 | 17.6    | 1.6  | 36.9 |
| <i>Olinia rochetiana</i>          | 0.54                                     | 1.8  | 45                                                  | -0.007 | 1.2 | 0.98 | 5.1                          | 22.0 |      | 3   | 27.8     | 31.0 | 40.7  | 15.4    | 21.6 | 24.0 |
| <i>Podocarpus latifolius</i>      | 0.27                                     | 0.9  | 27                                                  | -0.038 | 1.1 | 0.74 | 10.2                         | 23.9 |      | 24  | 24.9     | 6.3  | 56.7  | 17.8    | 6.4  | 31.1 |
| <i>Polyscias fulva</i>            | 1.00                                     | 3.4  | 26                                                  | -0.026 | 1.3 | 0.78 | 10.0                         | 24.4 | 25.8 | 63  | 30.6     | 6.7  | 78.0  | 18.3    | 5.2  | 32.1 |
| <i>Prunus africana</i>            | 0.17                                     | 0.6  | 19                                                  | -0.009 | 1.7 | 0.82 | 7.2                          | 19.2 |      | 20  | 22.8     | 7.3  | 47.8  | 13.9    | 5.4  | 22.8 |
| <i>Psychotria mahonii</i>         | 0.36                                     | 1.2  | 15                                                  | -0.039 | 1.2 | 0.74 | 7.3                          | 14.6 |      | 14  | 16.9     | 5.7  | 36.3  | 9.7     | 5.1  | 15.4 |
| <i>Rapanea melanophloeos</i>      | 0.29                                     | 1.0  | 37                                                  | -0.060 | 0.8 | 0.75 | 12.3                         |      |      | 34  | 16.9     | 5.3  | 32.8  | 16.4    | 6.0  | 25.4 |
| <i>Strombosia scheffleri</i>      | 0.36                                     | 1.2  | 34                                                  | -0.062 | 0.9 | 0.89 | 12.8                         | 27.1 | 32.2 | 22  | 25.4     | 6.1  | 86.2  | 19.7    | 8.3  | 32.7 |
| <i>Syzygium guineense</i>         | 7.94                                     | 26.6 | 31                                                  | -0.057 | 0.9 | 0.69 | 10.8                         | 23.8 | 29.1 | 175 | 41.3     | 5.1  | 106.6 | 21.1    | 2.1  | 45.2 |
| All species                       |                                          |      |                                                     |        |     |      |                              |      |      |     |          |      |       |         |      |      |
| Mean                              |                                          |      | 47                                                  | -0.055 | 0.9 | 0.79 | 11.1                         | 23.5 | 30.1 |     | 28.1     | 7.3  | 65.6  | 18.1    | 7.0  | 30.2 |
| Sum                               | 27.49                                    | 92.2 |                                                     |        |     |      |                              |      |      |     | 930      |      |       |         |      |      |

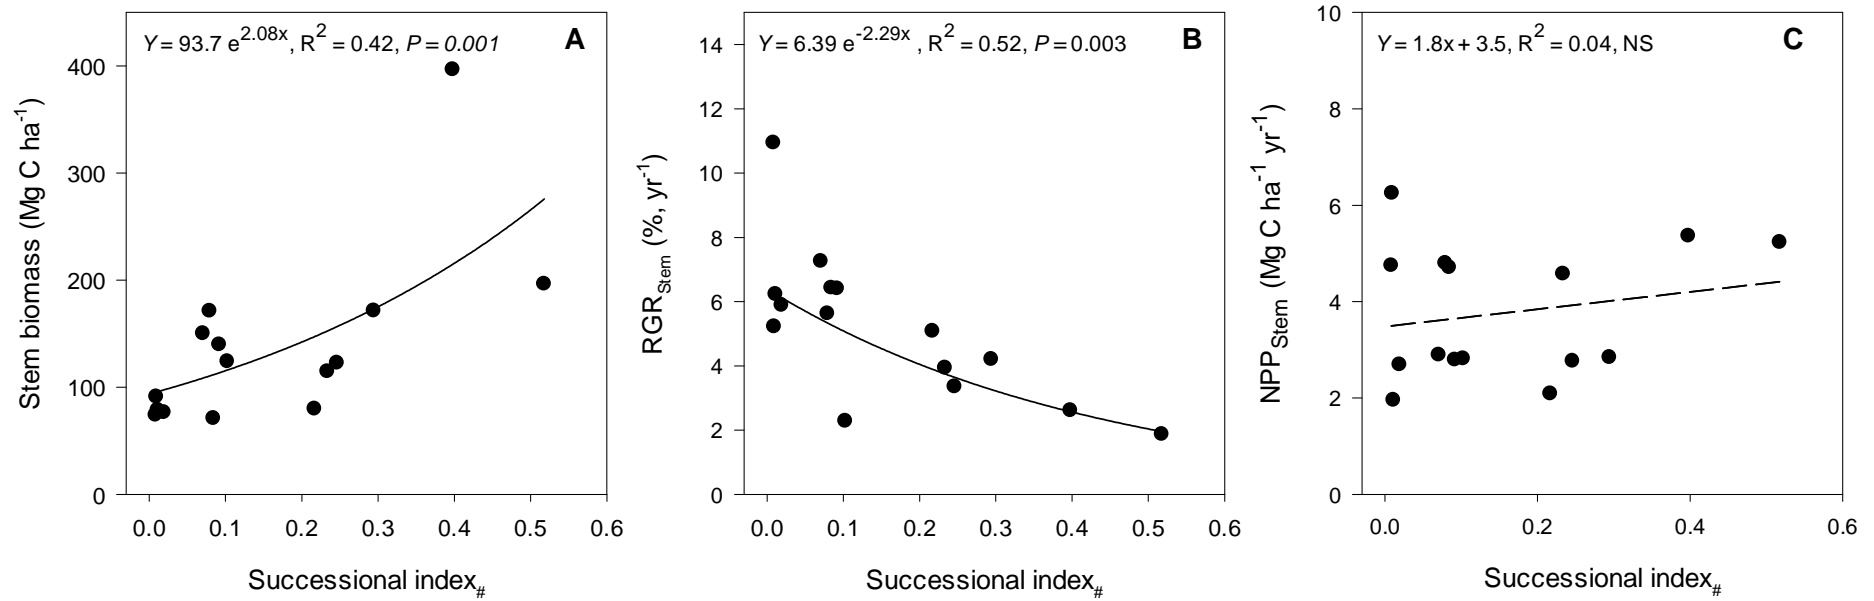

**Figure S1.** Biomass, relative growth rates (RGR) and net primary production (NPP) of stems including branches of each plot in relation to its successional index, based on number of stems (#) of the most abundant early and late successional species (eq 9). Biomass, RGR, and NPP is calculated from eq. 3, 6, 5, respectively based on measurements of  $D_{BH}$ ,  $H$  and  $\rho$ .
